# Supplementary material
Source: Springer Nature journal article supplement (https://www.springermedizin.de/resource/supplementary/12889_2014_7415_MOESM1_ESM.pdf/9497208)
Supplement: MOESM1 [file 9497208]

# Diagram using directed acyclic graph

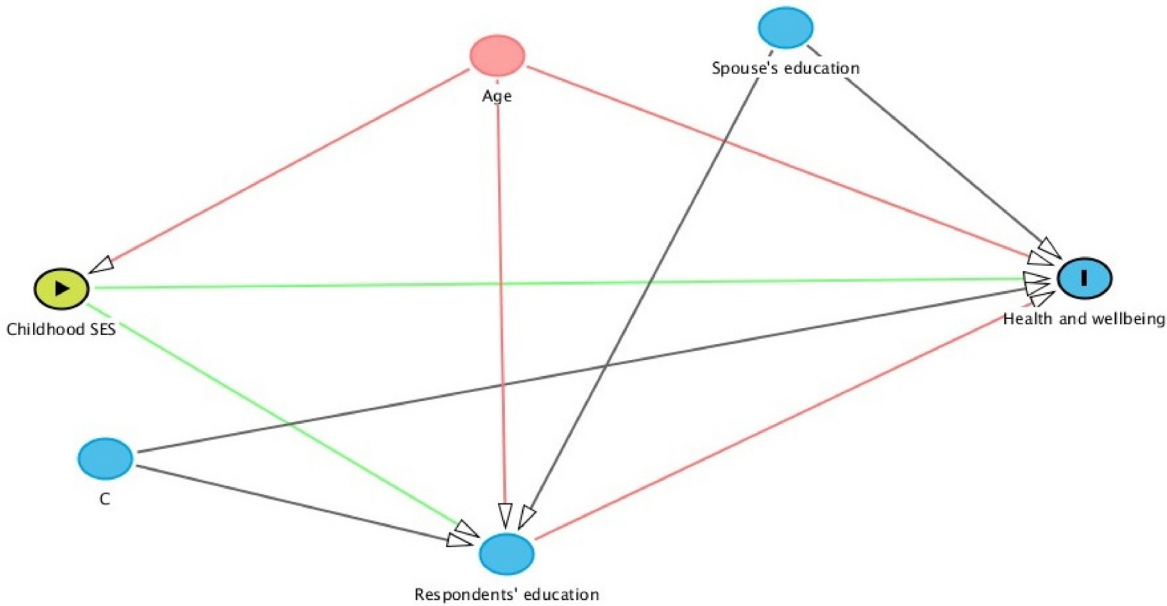

▶ = Childhood SES (exposure).

I = Health and wellbeing (outcome).

● = Respondents' education (mediator).

● = Spouse's education (mediator-outcome confounder).

● = Age (exposure-outcome/ mediator-outcome/ exposure-mediator confounder).

C ● = Fathers' education, mothers' education, when ▶ = Childhood financial conditions.

C ● = Childhood financial conditions, mothers' education, when ▶ = Fathers' education.

C ● = Childhood financial conditions, fathers' education, when ▶ = Mothers' education.
